# Supplementary material for: KLF15 controls brown adipose tissue transcriptional flexibility and metabolism in response to various energetic demands
Source: PubMed Central journal article supplement — iScience. 2022 Oct 8;25(11):105292. doi: 10.1016/j.isci.2022.105292 (PMC9593730; doi:10.1016/j.isci.2022.105292), 2022-10-08
Supplement: mmc1.pdf [file mmc1.pdf]

iScience, Volume 25

## **Supplemental information**

**KLF15 controls brown adipose**

**tissue transcriptional flexibility and metabolism**

**in response to various energetic demands**

**Liyan Fan, Alexander F. Lesser, David R. Sweet, Komal S. Keerthy, Yuan Lu, Ernest R. Chan, Vinesh Vinayachandran, Olga Ilkayeva, Tapatee Das, Christopher B. Newgard, and Mukesh K. Jain**

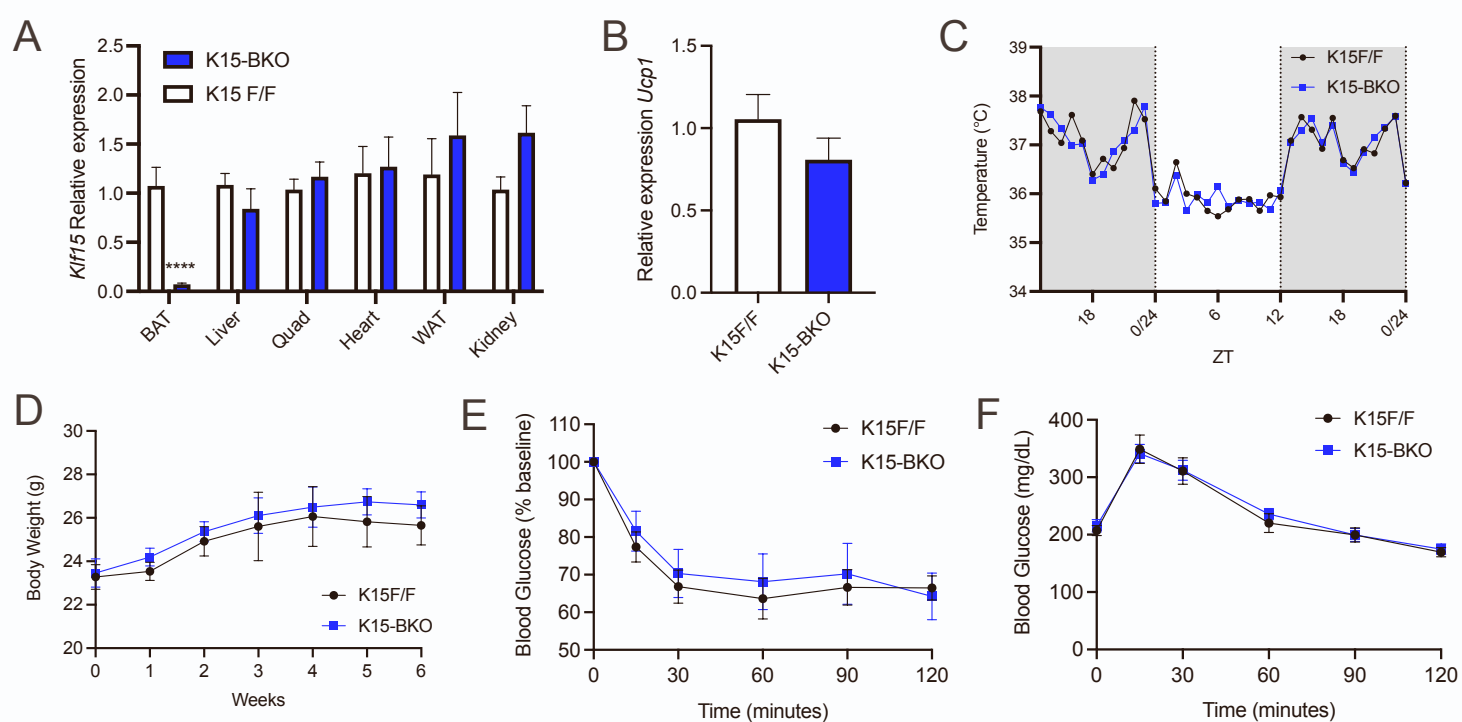

**Figure S1. Baseline metabolic characterization of K15-BKO mouse, Related to Figure 1.** (A) *Kif15* expression across multiple organs demonstrating specificity of BAT *Kif15* KO in K15-BKO animals (n=4-6). (B) Relative *Ucp1* expression in BAT of K15F/F vs K15-BKO (n=5-6). (C) Continuous core body temperature measurement using implantable temperature telemetry devices at room temperature (n=6). (D) Body weight (g) measurements starting from 8 weeks of age. (E) Intraperitoneal insulin tolerance test (IPITT) and (F) Intraperitoneal glucose tolerance test in K15F/F and K15-BKO at 8-10 weeks of age (n=8-11). Data represent mean  $\pm$  SEM. Comparisons between groups were performed using an unpaired, 2-tailed Student's t test, \*p<0.05, \*\*p<0.01, \*\*\*p<0.001, \*\*\*\*p<0.0001.

### RT vs Cold

### RT vs Fasting

### RT vs C+F

K15F/F      K15-BKO

K15F/F      K15-BKO

K15F/F      K15-BKO

Up

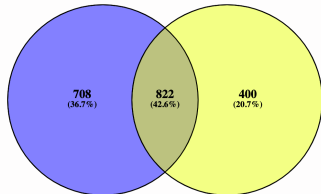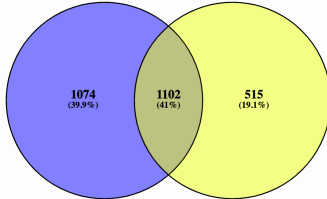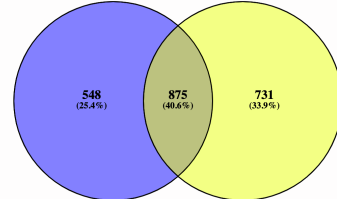

K15F/F      K15-BKO

K15F/F      K15-BKO

K15F/F      K15-BKO

Down

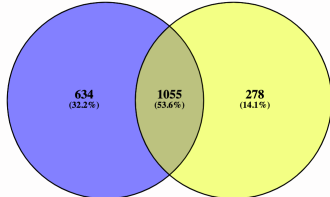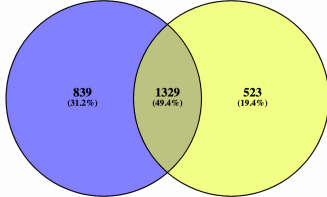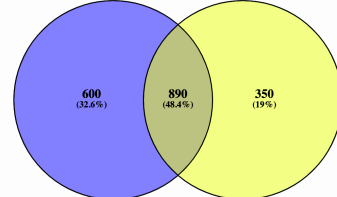

**Figure S2. K15-BKO mice demonstrate significant deviations from normal transcriptional adaptations to energy demanding states, Related to Figure 2.** Comparison of overlap of up- and down-regulated genes identified in K15F/F and K15-BKO BAT in response to cold challenge, fasting, and C+F.

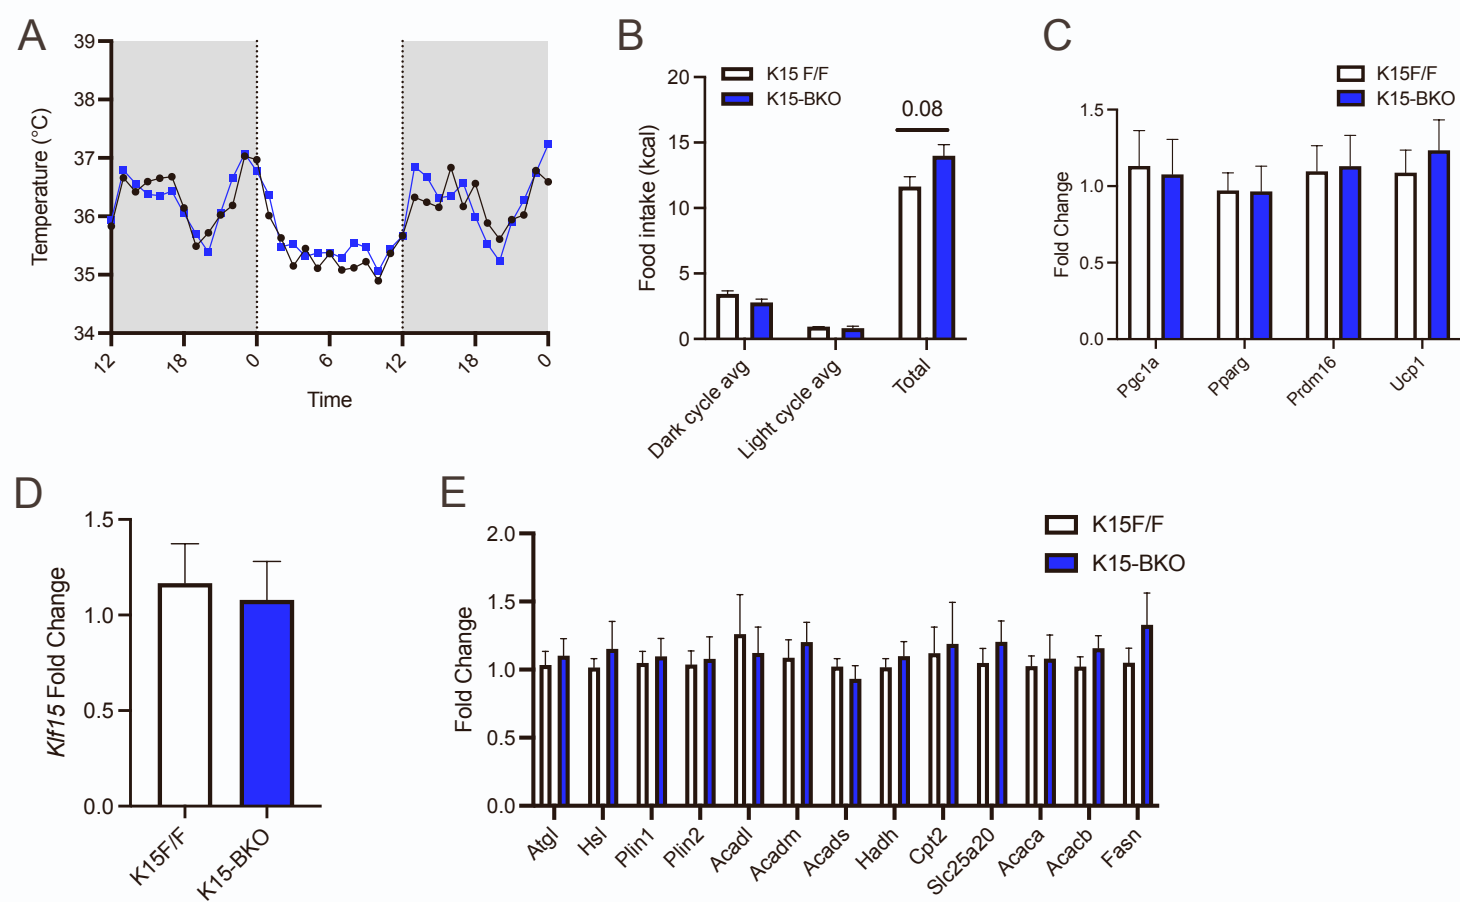

**Figure S3. K15-BKO maintain temperature in cold, Related to Figure 3. (A)** Continuous core body temperature measurement using implantable temperature telemetry devices at 4°C cold challenge (n=6). **(B)** Food intake during dark cycle, light cycle, and total across 24h cycle (n=4). **(C)** Fold change of browning genes in subcutaneous adipose tissue of K15F/F vs K15-BKO in C+F condition (n=8). **(D)** Fold change in *Klf15* expression in subcutaneous adipose tissue in C+F condition (n=8). **(E)** Fold change of select lipid metabolism genes in the subcutaneous adipose tissue of K15F/F and K15-BKO mice with C+F condition (n=8). Data represent mean  $\pm$  SEM. Comparisons between groups were performed using an unpaired, 2-tailed Student's t test.

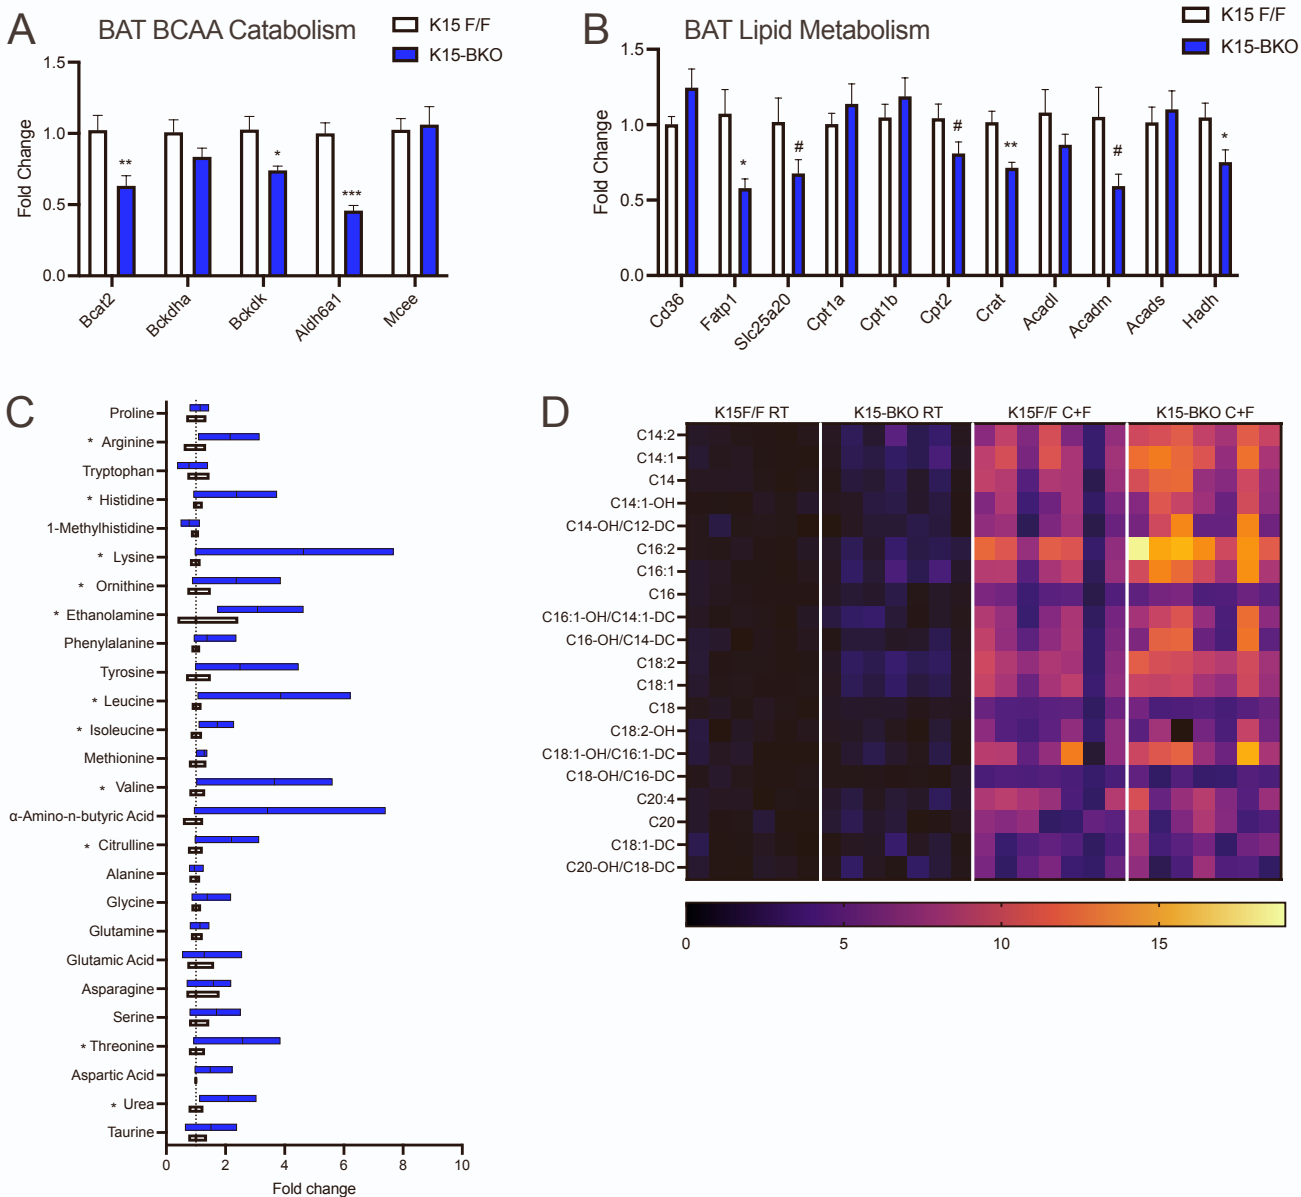

**Figure S4. K15-BKO experience altered BCAA and FA metabolism in C+F conditions, Related to Figure 4. (A)** qPCR of BCAA catabolism genes in BAT of K15 F/F vs K15-BKO mice (n=6-8). **(B)** qPCR of BCAA catabolism genes in BAT of K15 F/F vs K15-BKO mice (n=6-8). **(C)** Circulating amino acid levels at C+F, normalized to K15F/F (n=5). **(D)** Heatmap depicting circulating acylcarnitine levels K15F/F and K15-BKO at RT and after C+F, normalized to K15F/F RT (n=7). Data represent mean  $\pm$  SEM. Comparisons between groups were performed using an unpaired, 2-tailed Student's t test, #p < 0.1, \*p < 0.05, \*\*p < 0.01, \*\*\*p < 0.001.

**Table S1. PCR primers, Related to STAR Methods.**

| Gene name     | Forward                     | Reverse                  |
|---------------|-----------------------------|--------------------------|
| Klf15         | ACAGGCGAGAAGCCCTTT          | CATCTGAGCGGGAAAACCT      |
| Cyclophilin B | TTCTTCATAACCACAGTCAAGACC    | ACCTTCCGTACCCACATCCAT    |
| Fatp1         | GACAAGCTGGATCAGGCAAG        | GAGGCCACAGAGGCTGTTC      |
| Cd36          | TTGTACCTATACTGTGGCTAAATGAGA | CTTGTGTTTTGAACATTTCTGCTT |
| Cpt1a         | GACGAATCGGAACAGGGATA        | TGGCATAGCTGTCAATAGATGC   |
| Cpt1b         | GAGTGACTGGTGGGAAGAATATG     | GCTGCTTGCACATTTGTGTT     |
| Slc25a20      | TGAAGGCCCTGTTACACTCA        | CCTCCAGAGAGTCAGCCATC     |
| Cpt2          | CCAAAGAAGCAGCGATGG          | TAGAGCTCAGGCAGGGTGA      |
| Alt1          | CCTTCAAGCAGTTTCAAGCA        | GCTCCGTGAGTTTAGCCTTG     |
| Alt2          | GGAGCTAGCGACGGTATTTCT       | GATACTGGGGGATGGGAATC     |
| Bcat2.1       | GCTGCAGCCACACTAGGAC         | TCTTTTGGACCCACATAGAAGC   |
| Bcat2         | TGCTCTGGTCTGCACTACTCTC      | GTAGCATCCTGTCCATGTTGAG   |
| Bckdk         | TGCTCAAGAATGCCATGAGA        | TGAGATCCTGATGATGAGATCAAT |
| Bckdha        | TTCGGGGCTTGGCTAGAT          | GAAGTGGGGCTTGTCTGTC      |
| Bckdhb        | ATTAGCCAAAGACCCCACTG        | CGTAAACCAACAGTGCATCG     |
| Ucp1          | GGCAATCCTTCTGTTTTTGC        | CCAAAGTCCGCCTTCAGA       |
| Mut           | TGCAGTGCAGACAATGTTAT        | GCACACTGCCAGACATCG       |
| Fah           | CCTGCAGACTCTTAGACATGGA      | GATTGGCTCTCCGAATCTGT     |
| Glud1         | GGTCATCGAAGGTACCG           | TCAGTGCTGTAACGGATACCTC   |
| Sds           | CTACTCCTCTCGCTCGCTCT        | CTTCACATGGAGGGACTCCT     |
| Hmgcl         | GTGAAGATGGCGTCAGTGAG        | AGTGCCCATGGAGGAGGT       |
| Acaa2         | AAATGTGCGCTTCGGAAC          | CGGTTAATCCTGCCCAAAAG     |
| Mcee          | CACTGGGGAGTCATAGTCCAA       | TGCACTGATGTTGTCCACCT     |
| Got1          | GCTGTGCTTCTCGCCTAGTT        | AAGACTGCACCCCTCCAAC      |
| Got2          | ATGGCTGCTGCCTTTCAC          | GATCTGGAGGTCCCATTTC      |
| Acaa1         | GGTCTTATGACATTGGCATGG       | CTCTGGCTTTCTCACTCTCCA    |
| Aldh6a1       | CTGGGCAGAGTCGGTGAG          | GGCATTTACCTTAGAAGAAACCTG |
| Fh1           | GCACCCCAATGATCATGTTA        | ATTGCTGTGGGAAAGGTGTC     |
| Sdhd          | CCTGCTCTGTGGTGGACTACT       | CCCATGAACGTAGTCGGTAAC    |
| Aco2          | GTTGGGGGTGAGAAAGACCT        | GAAGCCACACCATACTTGG      |
| ldh3a         | GAGGTTTTGCTGGTGGTGT         | TGAAATTTCTGGGCAATTC      |
| ldh3b         | ATGCTGCGGCATCTCAAT          | CCATGTCTCGAGTCCGTACC     |
| ldh3g         | CATCCTCATTGTACGGGAAAA       | ACCACTCCTGCTACGCTCTC     |
| Ogdh          | TTCATCCACAGACAACTTGG        | AGGAAGTGCTGGCTCCTGT      |
| Suclg1        | CACATTCACAAGAAGGGAAGAAT     | GGTTGTTTGGTGAAGTCTTC     |
| Suclg2        | GAAAATCTGGGCTTCCTTGG        | GAAAATCTGGGCTTCCTTGG     |
| Sdha          | TGTTTCAGTTCCACCCACA         | TCTCCACGACACCCTTCTG      |
| Cs            | GGAAGGCTAAGAACCCTTTGG       | TCATCTCCGTCATGCCATAGT    |
| Mdh2          | TTGTGATGTGGTGGTCATCC        | ACAGGTCATCCCGTGTCTATT    |
| Sdhc          | GAAGAAGAACACGAGTTCAAACC     | GTGCCATAGGAAGAGACCATT    |
| Sdhd          | CTGGTGGAAACGGAGACAAGT       | GCGTTCCTCTGTGAAGTCGT     |
| Fbp1          | ACTTTGACCCTGCCATCAAT        | ACCATAGGGGGCTGAACC       |
| Pcx           | TCCGTGTCCGAGGTGTA           | CAGGAAGTGTGGTTGTTGA      |
| G6pc          | TCTGTCCCAGGATCTACCTTG       | GAAAGTTTCAGCCACAGCAA     |
| Crat          | GCCATTGCTATGCACTTCAAC       | GGTCCGAAGAACATGACACA     |
| Ldha          | GGCACTGACGCAGACAAG          | TGATCACCTCGTAGGCACTG     |

|        |                             |                         |
|--------|-----------------------------|-------------------------|
| Pgc1a  | AATTTTTCAAGTCTAACTATGCAGACC | CAAAATCCAGAGAGTCATCTTGC |
| Pparg  | GAAAGACAACGGACAAATCACC      | GGGGGTGATATGTTTGAACCTG  |
| Prdm16 | TCTCGGATCCCATCCTCA          | GGAAGATCTTGCCACAGTA     |
| Cidea  | TTCAAGGCCGTGTTAAGGA         | CCTTTGGTGCTAGGCTTGG     |
| Atgl   | GAGCTTCGCGTCACCAC           | CACATCTCTCGGAGGACCA     |
| Hsl    | GCGCTGGAGGAGTGTTTT          | CGCTCTCCAGTTGAACCAA     |
| Plin1  | AACGTGGTAGACACTGTGGTACA     | TCTCGGAATTCGCTCTCG      |
| Plin2  | CTCCACTCCACTGTCCACCT        | GCTTATCCTGAGCACCCCTGA   |
| Acadl  | GCTTATGAATGTGTGCAACTCC      | CCGAGCATCCACGTAAGC      |
| Acadm  | TCTTCCCCACAGCTCAGGT         | GTAATCCAAGCCTGCACCA     |
| Hadh   | TGGATACTACAAAGTTCATCTTGGA   | AAGGACTGGGCTGAAATAAGG   |
| Acaca  | GCGTCGGGTAGATCCAGTT         | CTCAGTGGGGCTTAGCTCTG    |
| Acacb  | TGAATCTCACGCGCCTACTA        | GCCTCTCTTACCAGATGGA     |
| Fasn   | CAACATGGGACACCCTGAG         | GTTGTGGAAGTGCAGGTTAGG   |
